# Supplementary material
Source: publisher figshare collection journal article supplement (https://diabetesjournals.figshare.com/articles/dataset/_/20126396)
Supplement: Supplementary file 1 [file 35998982]

## Supplementary Figure Legend

**Figure S1. Identification of lncRNAs differentially expressed in the liver of hyperlipidemia mice.** Serum(A) and hepatic (B) lipid levels of mice after ND and HFD treatment for 23 weeks (n=4/group). (C) RT-qPCR analysis of lncRNA expression levels of mice after ND and HFD treatment for 23 weeks (n=3/group). All values are as Mean  $\pm$  SEM. \* $p < 0.05$ , \*\* $p < 0.01$ , \*\*\* $p < 0.001$ .

**Figure S2. Characterization of the non-coding property, expression profile and sub-cellular location of lncRHL.** (A) Nucleotide sequences of full-length Gm26584 analyzed by RACE. (B) Gene structure of lncRHL (Gm26584) and Rapid amplification of cDNA ends (RACE) in the mouse genome. (C) Coding potency of lncRHL sequence was analyzed using the Coding Potential Calculator (website) lncBATE1, lncLSTR served as control non-coding gene. CCAAT/enhancer-binding protein alpha (Cebp $\alpha$ ) and Eukaryotic translation initiation factor 4F  $\alpha$ 3 (Eif4 $\alpha$ 3) served as control coding genes. Scores above 0 suggest coding potential, whereas scores below 0 represent no coding potential. (D) FISH analysis in Hepa1-6 cells. lncRHL sub-cellular localization in mouse Hepa1-6 was assessed by a laser confocal microscopy. Red, lncRHL or snRNA U6 or 18S. snRNA U6 and 18S were selected as a positive control for nucleus or cytosol, respectively, blue,4',6-diamidino-2-phenylindole staining. Magnification: x400. (E) RT-qPCR analysis of lncRHL expression in primary hepatocytes in the presence or absence of 400  $\mu$ M oleic acid (OA) for 6 h (n=3/group). All values are as Mean  $\pm$  SEM. \* $p < 0.05$ , \*\* $p < 0.01$ , \*\*\* $p < 0.001$ .

**Figure S3. Blood chemistry analysis of liver-specific knockdown of lncRHL in**

**mice.** The samples analyzed here were from the same samples used in Fig 2. **(A-C)** Knockdown of lncRHL increases serum NEFA **(A)**, LDL-C **(B)** but decreases HDL-C **(C)** levels in mice. Levels of NEFA, LDL-C and HDL-C in serum of control (Ad-Scrambel) or lncRHL knockdown (Ad-shlncRHL) mice were measured using enzymatic kits (n=8/group). All values are as Mean  $\pm$  SEM. \* $p < 0.05$ , \*\* $p < 0.01$ , \*\*\* $p < 0.001$ .

**Figure S4. Knockdown of lncRHL has no effect on mRNA levels of genes involved in hepatic lipogenesis and fatty acid oxidation.** The samples analyzed here were from the same samples used in Fig 2. **(A)** Relative mRNA levels of genes involved in lipogenesis and fatty acid oxidation in the livers of control (Ad-Scrambel) or lncRHL knockdown (Ad-shlncRHL) mice under ND or HFD conditions. Total RNA was subjected to RT-qPCR quantification and mRNA levels were expressed relative to Ad-Scramble under ND conditions, respectively (n=4/group). **(B)** Western blot analysis of protein levels of PCSK9 and LPL in serum of control (Ad-Scrambel) or lncRHL knockdown (Ad-shlncRHL) mice under ND or HFD conditions. Albumin (ALB) as loading control of serum (n=3/group). All values are as Mean  $\pm$  SEM. \* $p < 0.05$ , \*\* $p < 0.01$ , \*\*\* $p < 0.001$ .

**Figure S5 Knockdown of lncRHL has no effect on cell mortality of primary hepatocytes.** **(A)** Relative mRNA levels of genes involved in lipogenesis and fatty acid oxidation in primary hepatocytes transfected with ssNC or sslncRHL (100 nM) for 6 h. Total RNA was subjected to RT-qPCR quantification and mRNA levels were expressed relative to ssNC control cells (n=3/group). **(B)** Apoptotic rates of mice primary

hepatocytes were measured by flow cytometry after transfected with ssNC or sslncRHL (100 nM) for 48 h. Representative flow cytometry of cells stained with Annexin V-FITC and PI (left) and quantitative analysis (right) of apoptotic cells of primary hepatocytes (n=3/group). (C) Apoptotic rates of mice primary hepatocytes were measured by TUNEL analysis after transfected with ssNC or sslncRHL (100 nM). Representative image of TUNEL staining (left) and quantitative analysis (right) of TUNEL positive cells (n=10/group). Scale bar, 40  $\mu$ m. These experiments were repeated three times with similar results. All values are as Mean  $\pm$  SEM. \* $p$  < 0.05, \*\* $p$  < 0.01, \*\*\* $p$  < 0.001.

**Figure S6. Depletion of MTTP blocks VLDL secretion in primary hepatocytes with knockdown of lncRHL.** 6-8 weeks old *C57BL/6J* male mice were infected with  $2.5 \times 10^{11}$  recombinant adenovirus particles of Ad-shNC or Ad-shMTTP through tail vein injection for 7 days. After that, primary hepatocytes were isolated and transfected with ssNC or sslncRHL (100 nM) for knockdown of lncRHL. (A) Knockdown lncRHL-induced increases in the mRNA level of *Mttp* were abolished by depletion of MTTP in primary hepatocytes. The mRNA levels of *lncRHL*, *Mttp* and *ApoB* were assessed by RT-qPCR (n=3/group). (B) Depletion of MTTP increases intracellular TAG level in primary hepatocytes with knockdown of lncRHL. The intracellular TAG level was measured using TAG assay kit and normalized to total protein (n=3/group). (C) Depletion of MTTP inhibits VLDL secretion in primary hepatocytes with knockdown of lncRHL. The secreted VLDL in the medium was measured using ELISA kit and normalized to total protein (n=3/group). (D) Depletion of MTTP reduces protein levels

of ApoB in culture medium of primary hepatocytes with knockdown of lncRHL (n=3/group). Representative western blot of ApoB protein levels in culture medium of primary hepatocytes with knockdown of lncRHL (upper). Ponceaus S staining as loading control (lower). **(E)** Depletion of MTTP restores protein levels of MTTP in Primary hepatocytes with knockdown of lncRHL. Western blot (left) and quantitative analysis (right) of MTTP and ApoB protein levels. All values are as Mean  $\pm$  SEM. \* $p$  < 0.05, \*\* $p$  < 0.01, \*\*\* $p$  < 0.001. These experiments were repeated three times with similar results.

**Figure S7. Identification of interact protein of lncRHL.** **(A)** Proteins associated with lncRHL were visualized by silver staining following RNA pull-down. **(B)** KEGG pathway analysis showed that the global gene expression profiles interacting with lncRHL were highly correlated with Metabolic pathways and NAFLD programs identified from RNA pull-down. **(C)** Mass spectrometry experiment revealed that lncRHL interacted with hnRNPs family proteins in primary hepatocytes. **(D)** hnRNPU binding sites within lncRHL by used online bioinformatics analysis tools (RBPmap, StarBase v2.0).

**Figure S8. Knockdown of hnRNPU decreases BMAL1 expression *in vitro*.** **(A)** Relative mRNA level of hnRNPU in liver of mice injected with Ad-Scramble or Ad-shlncRHL (n=4/group). The samples analyzed here were from the same samples used in Fig 2. **(B)** Knockdown of hnRNPU reduces mRNA level of *Bmal1* in primary hepatocytes. Primary hepatocytes were transfected with control siRNA or siRNAs targeting hnRNPU (#1 and #2) for 24 h. Total RNA was subjected to RT-PCR



quantification and mRNA levels of hnRNPU and Bmal1 were expressed relative to control siRNA treated cells. (C) Knockdown of hnRNPU reduces protein level of BMAL1 in primary hepatocytes. Representative Western blot (left) and quantitative (right) analysis of protein levels of hnRNPU and BAML1 in primary hepatocytes with or without knockdown of hnRNPU. Primary hepatocytes were transfected with control siRNA or siRNAs targeting hnRNPU (#1 and #2) for 24 h followed by treatments with 400  $\mu$ M oleic acid (OA) for 6 h. These experiments were repeated three times with similar results. All values are as Mean  $\pm$  SEM. \* $p$  < 0.05, \*\* $p$  < 0.01, \*\*\* $p$  < 0.001.

**Figure S9. Overexpression of lncRHL rescues expression level of hnRNPU and BMAL1 in lncRHL knockdown primary hepatocytes.** (A) Overexpression of lncRHL restores mRNA levels of *Bmal1*, *Gata4*, *Shp* and *Mtp* in lncRHL knockdown primary hepatocytes. After transfected with ssNC or sslncRHL for 12 h, the primary hepatocytes were infected with Ad-lncRHL or Ad- $\beta$ -gal for 6 h. Total RNA was subjected to RT-PCR quantification and mRNA levels were expressed relative to ssNC treated cells. (n=3/group). (B) Overexpression of lncRHL restores protein levels of hnRNPU and BAML1 in lncRHL knockdown primary hepatocytes. After transfected with ssNC or sslncRHL for 12 h, the primary hepatocytes were infected with Ad-lncRHL or Ad- $\beta$ -gal for 6 h. Representative Western blot (left) and quantitative analysis (right) of protein levels of hnRNPU and BMAL1 in primary hepatocytes. (n=3/group). These experiments were repeated three times with similar results. All values are as Mean  $\pm$  SEM. \* $p$  < 0.05, \*\* $p$  < 0.01, \*\*\* $p$  < 0.001.

A

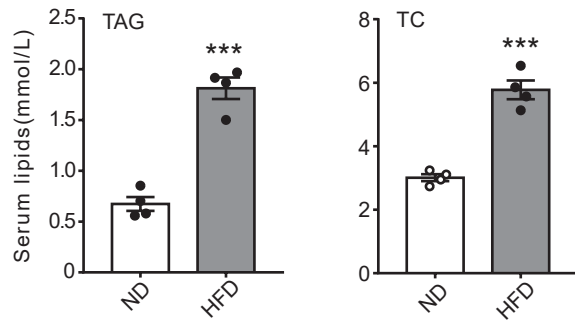

B

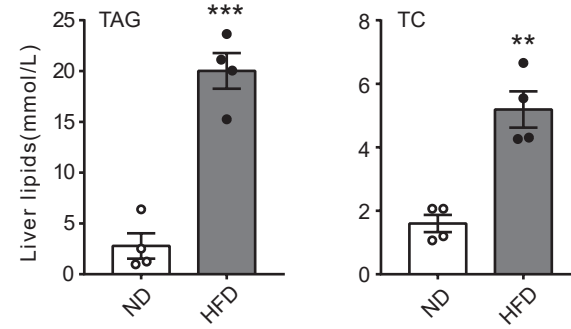

C

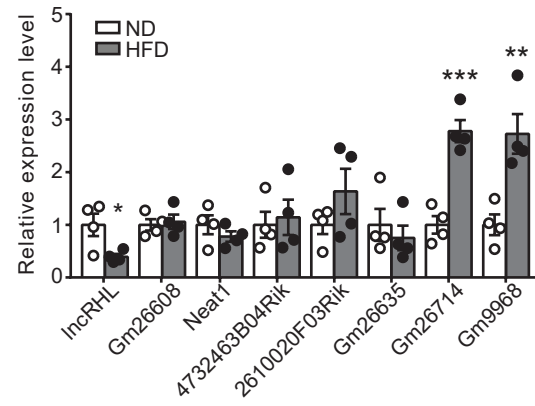

A

5'  
 GAAGAGAAAAGATTTCTAAAAGGATTCCATGTGTATTTAGGCCCTTCTCCAACCATCTGCC  
 TTATGAGGTTACCCATTTCCAAACAAAGGTTTTAAATACGGTGACTGTTCTTGGATTTGC  
 AAGAATGTACAACCAGCAGGTCCCTTTTGCAGTAAAGGGCATTATACTTGAAGGGGCA  
 TACTCATTTTTTCTCAGGTCAGAGGCAGAGGGAAGAGTTAACAGTGATCAATAGAGAC  
 CTTTCATGTGTCTGTTTTTGTTTTTGTTTTAAGTTTCATTTAAGGGTGATGACGGAGAAAAG  
 AAGGGAGTAAAAATGATGCGCGCACAAAGAAATTTTTCCATTGCTTGCCAGATTCAATC  
 TTTTTAGGCTACCCTTACTCCAGTCCTTACCTACACCCTAAAGAAGCTGATTTAGCTAGCA  
 AGAGAGGCATTCTCAGGATACGTGAGCTTCCAGGCATGGACTAACATGTGGTTTCAAAT  
 CAATAGTGTATTCTAACAGAAAAGCGTTACTTAATCTTAATTCTCCATTATGTGATAAAATA  
 ATCTATAGAAAATAGGTATCACTTTGGCCAGTTCTGTGCATGTAGCTGAAAAAAAATGTG  
 ACACATTTCTGTTGTATGATTTGCTATGATTTTGGTTTCTGAGACATTTGTTCCCTACAG  
 TCTTGAATATGAAATCTGTGTAATAATATGACTATGCATTTTTGCTGAAAAACAAATGTA  
 TGAATAAGAATAAATTTTGTAAAGCACAGTG 3'

B

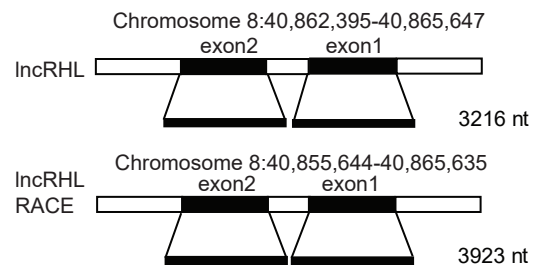

C

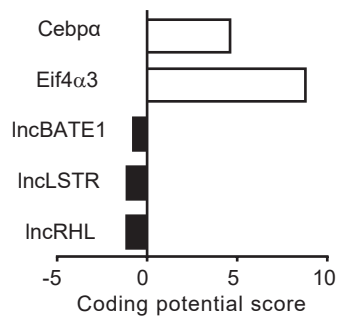

D

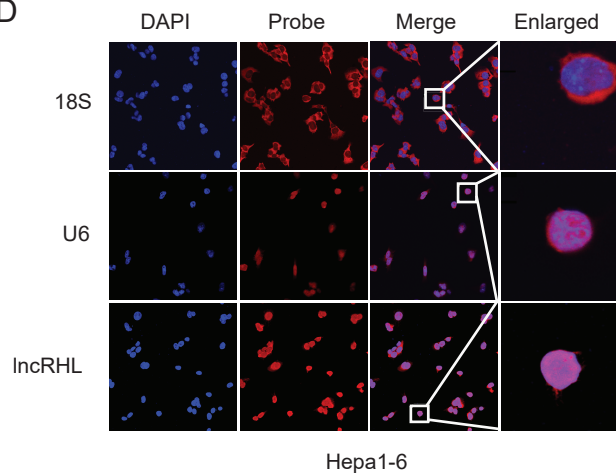

E

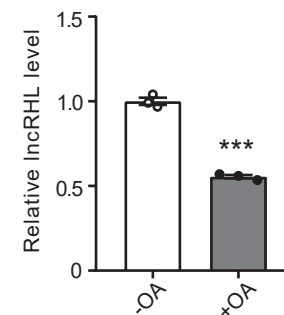

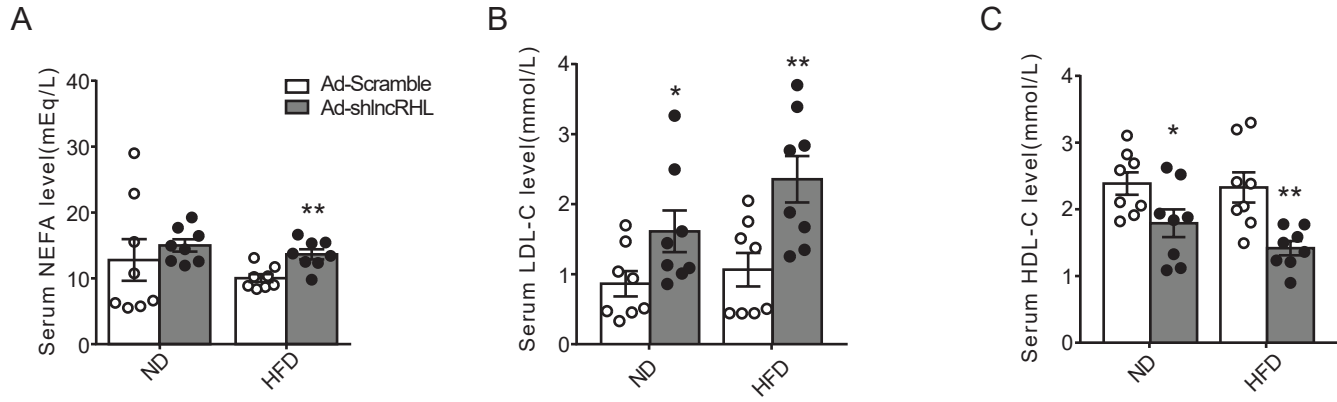

A

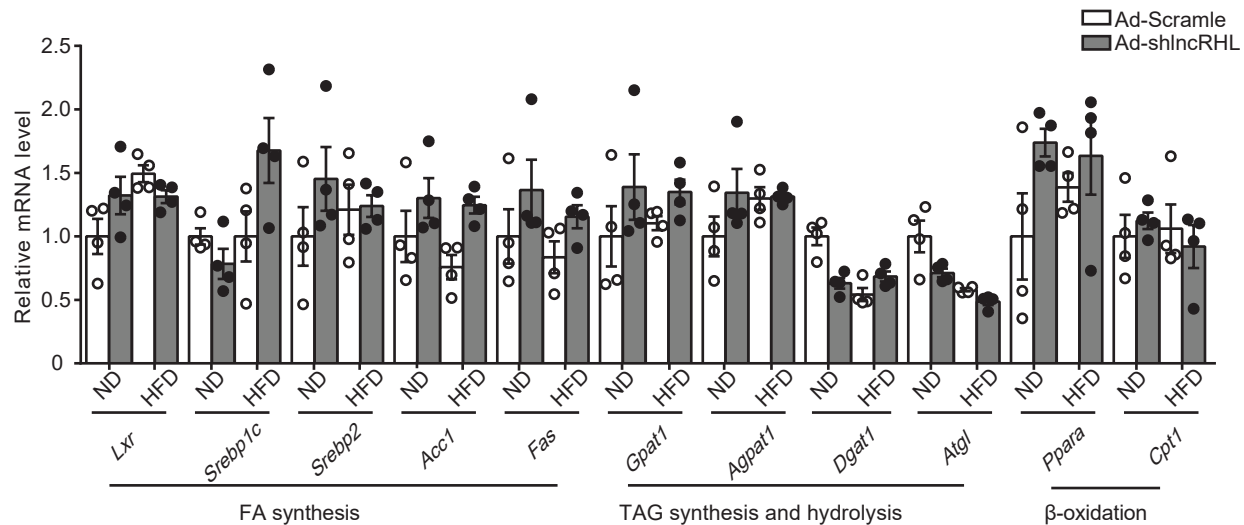

B

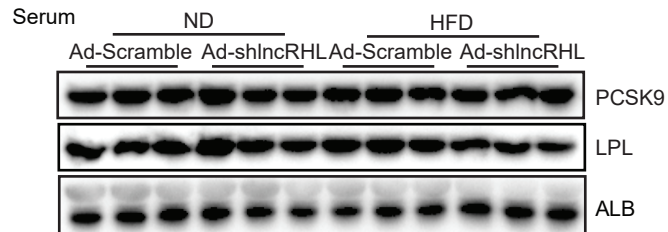

A

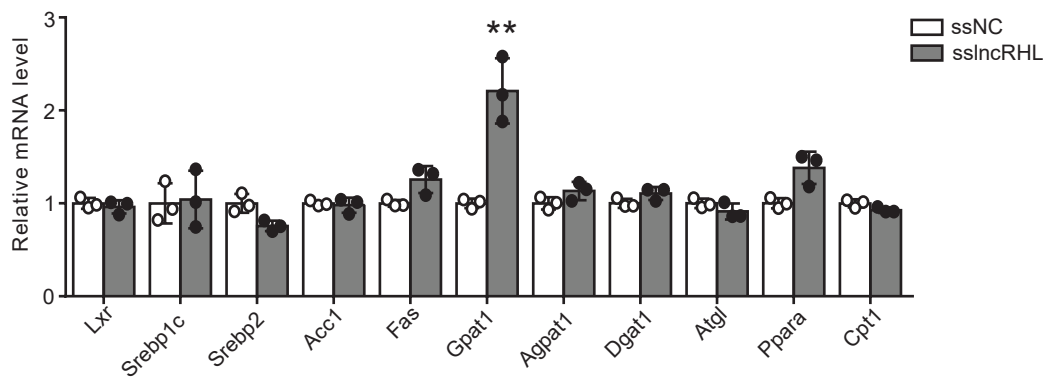

B

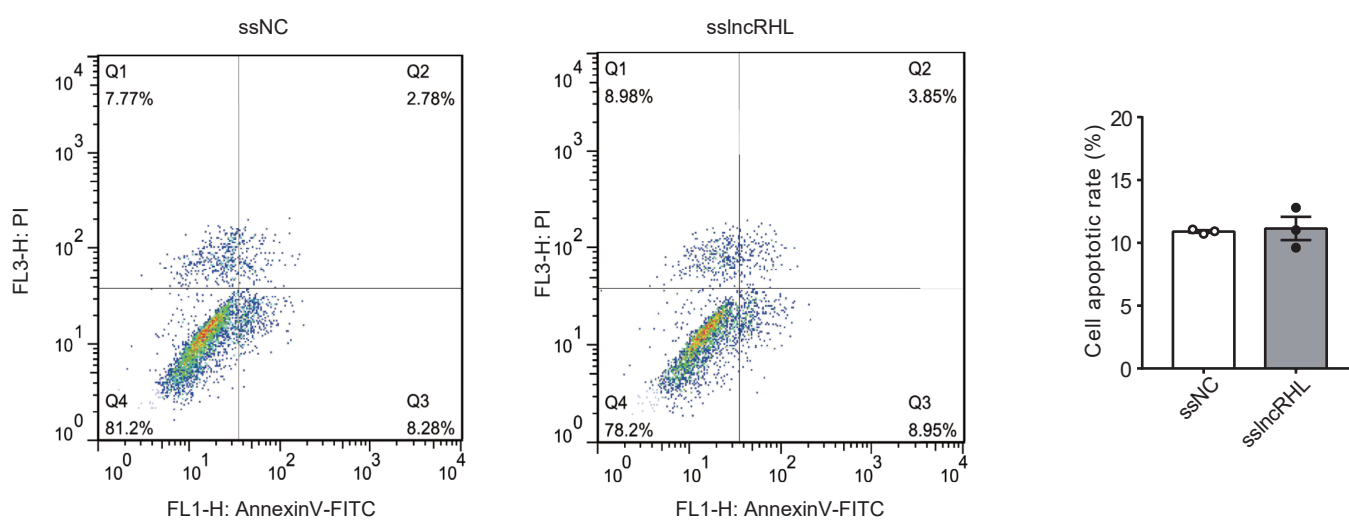

C

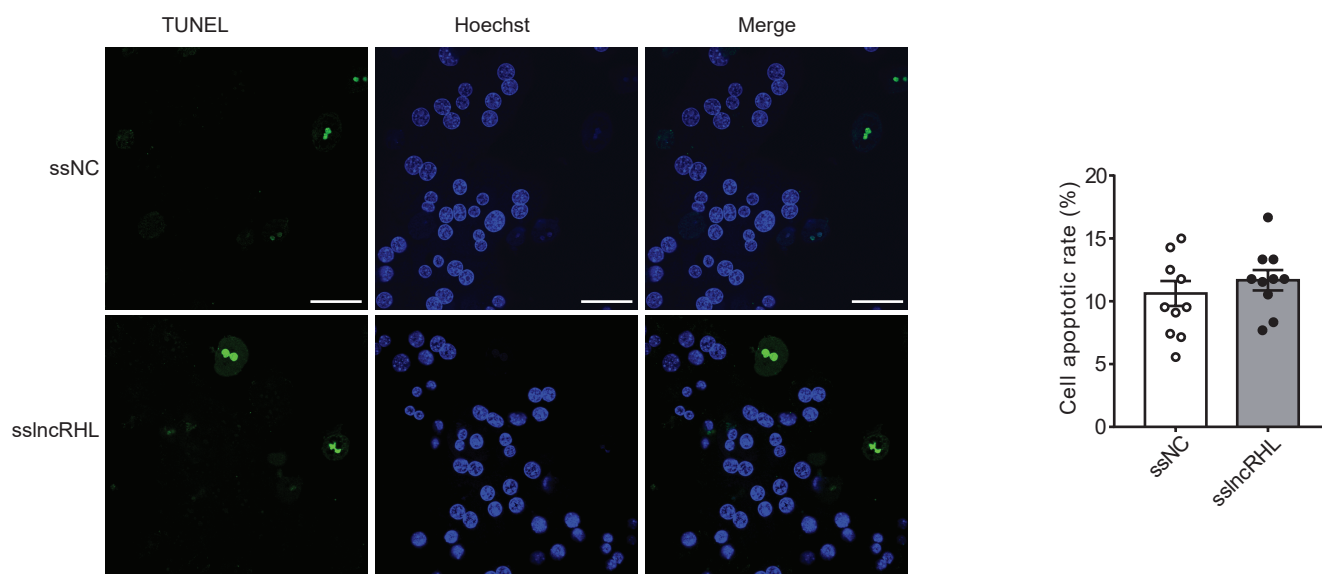

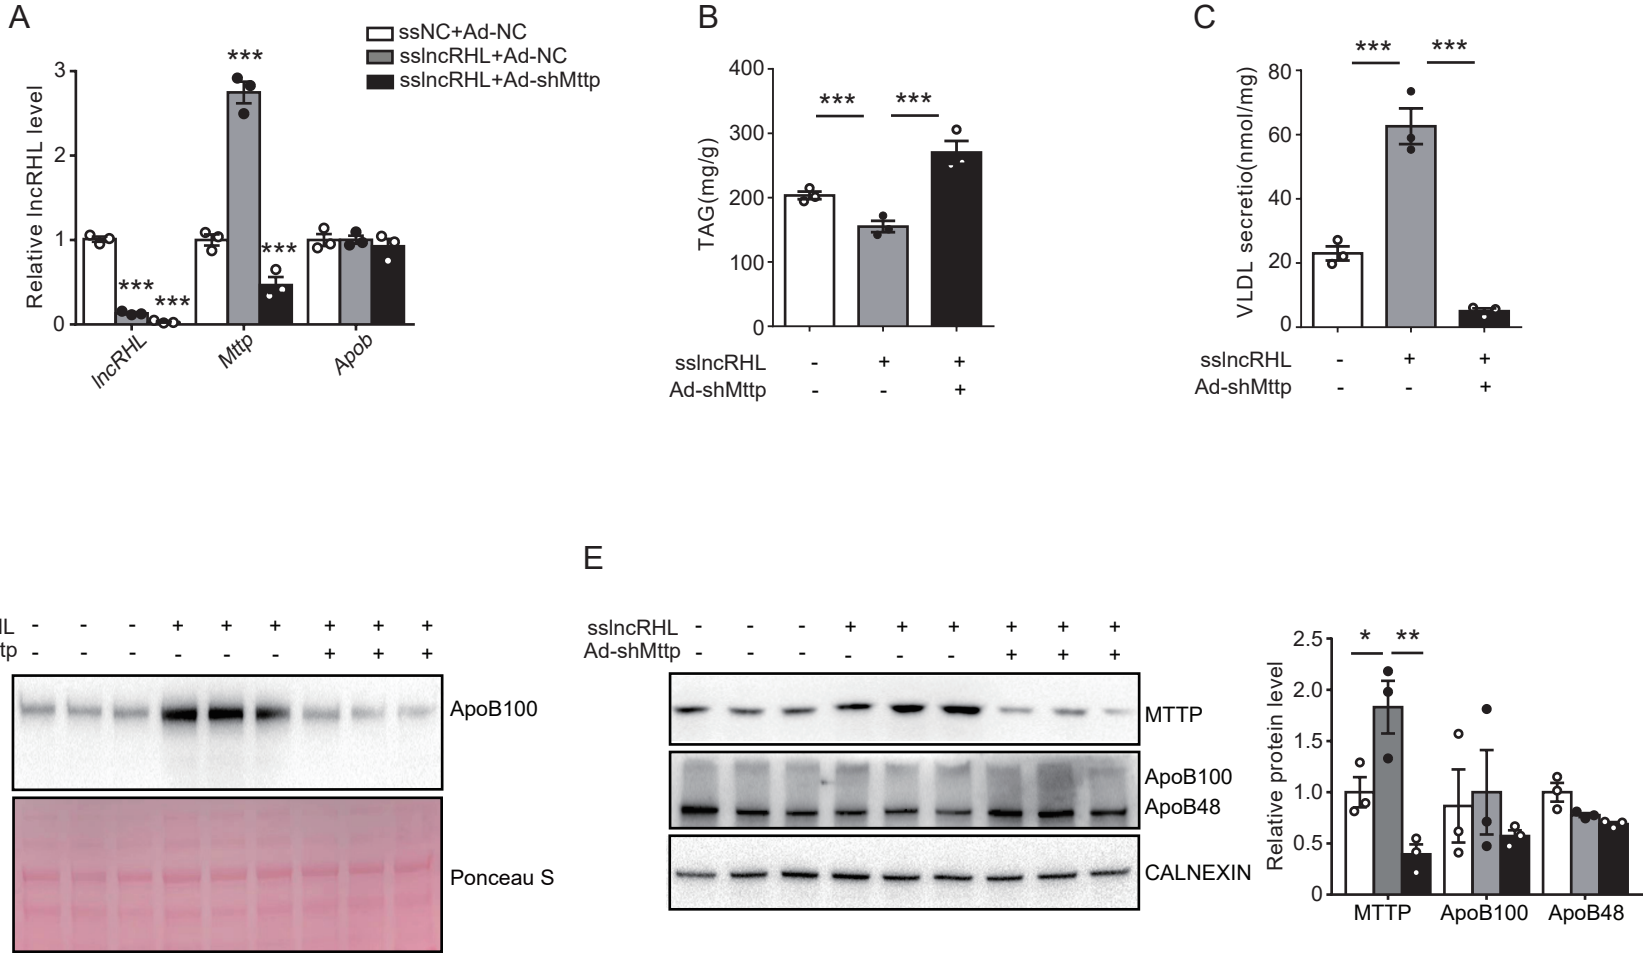

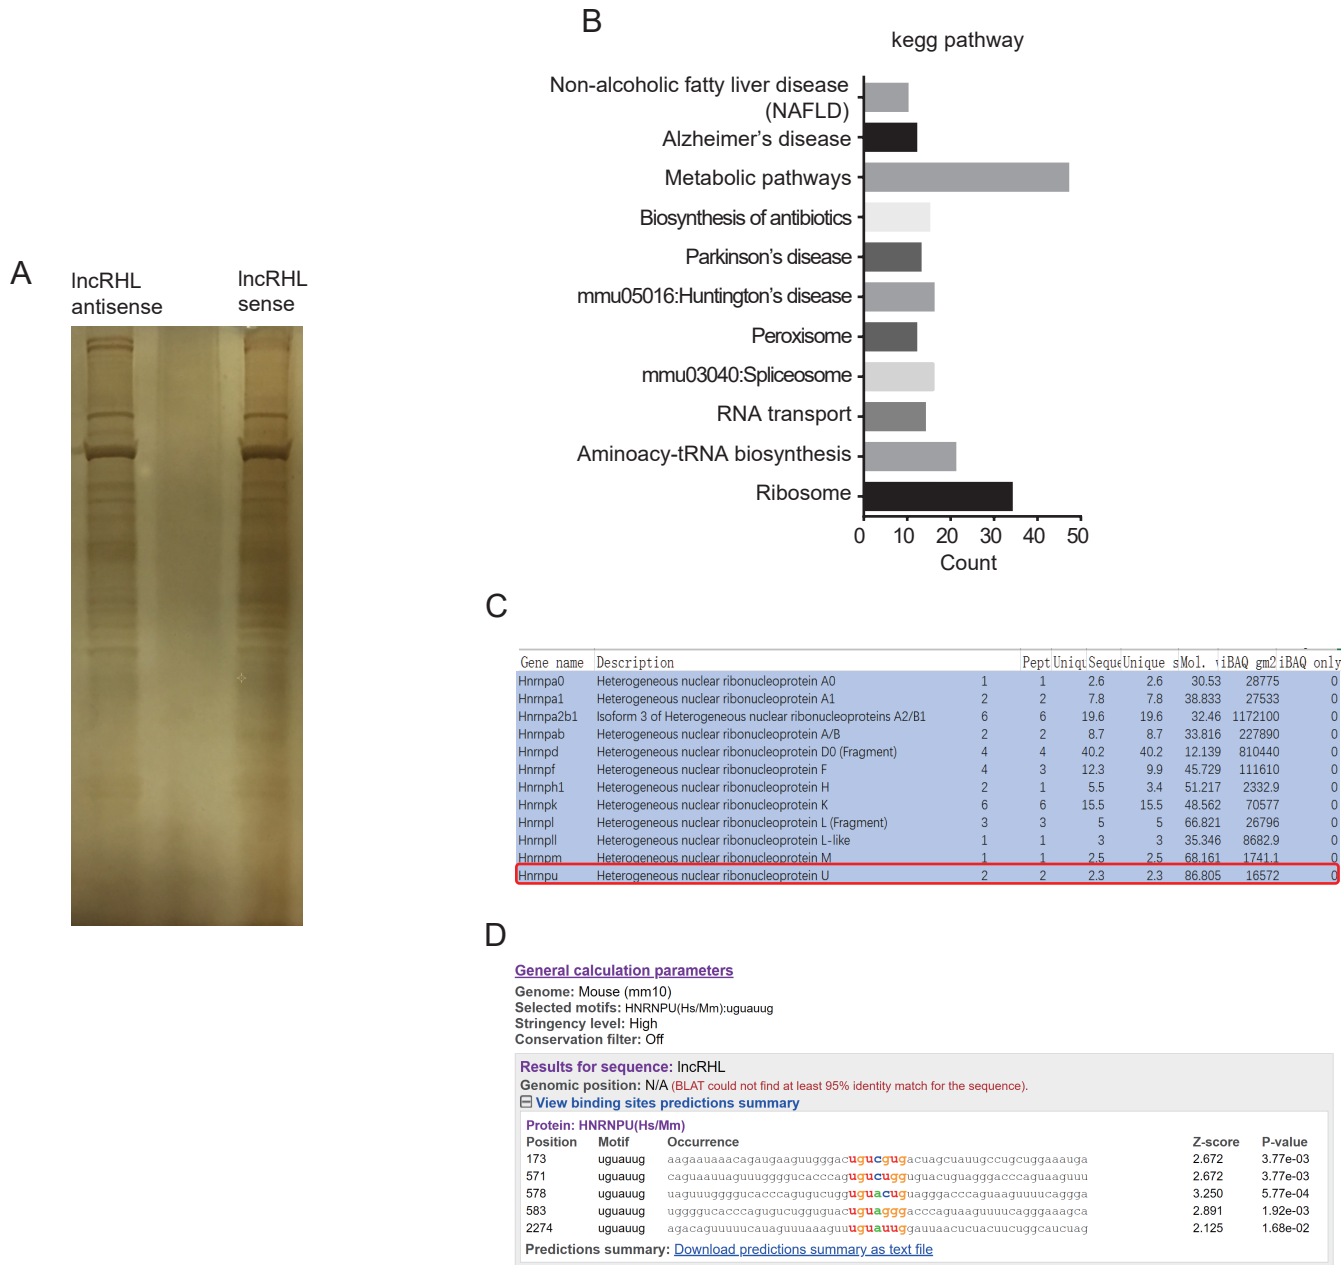



A

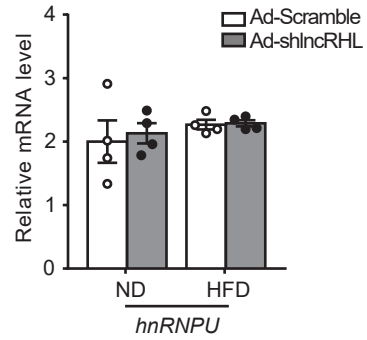

B

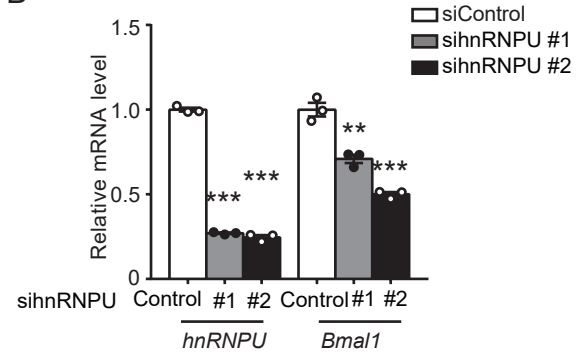

C

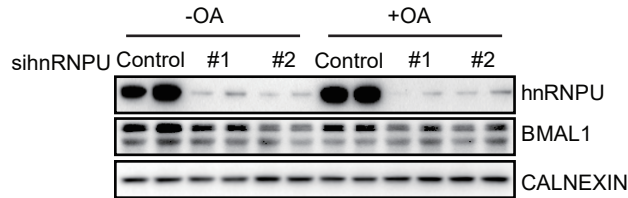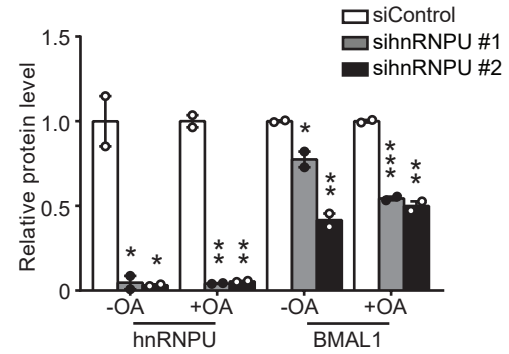

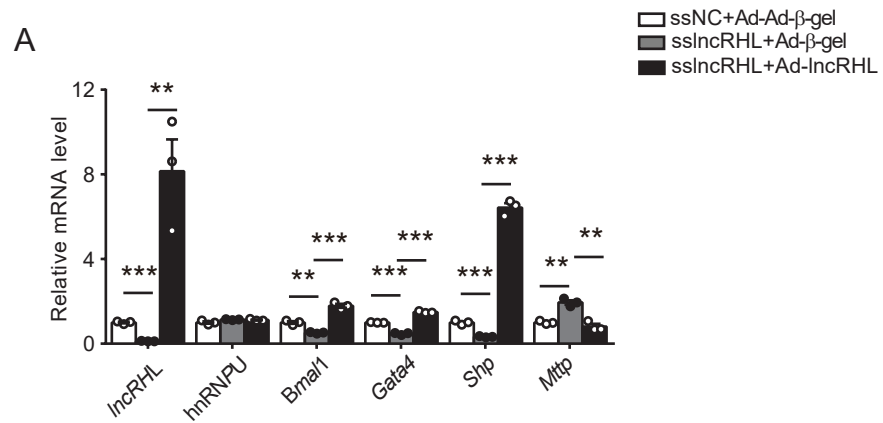

**B**

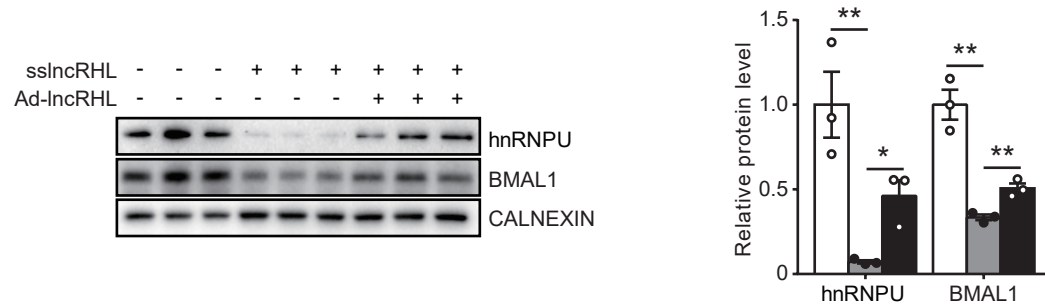

Supplementary Table S1. Summarized reads information of RNA sequencing.

| <b>Samples</b>                  | <b>ND</b>      | <b>HFD</b>     |
|---------------------------------|----------------|----------------|
| Raw Reads Number                | 97,697,212     | 81,641,384     |
| Raw Bases Number                | 12,212,151,500 | 10,205,173,000 |
| Clean Reads Number              | 93,697,058     | 74,533,490     |
| Clean Reads Rate (%)            | 95.91          | 91.29          |
| Clean Bases Number              | 11,712,132,250 | 9,316,686,250  |
| Low-quality Reads Number        | 401,960        | 324,800        |
| Low-quality Reads Rate (%)      | 0.41           | 0.4            |
| Ns Reads Number                 | 53,394         | 43,116         |
| Ns Reads Rate(%)                | 0.05           | 0.05           |
| Adapter Polluted Reads Number   | 3,544,800      | 6,739,978      |
| Adapter Polluted Reads Rate (%) | 3.63           | 8.26           |
| Raw Q30 Bases Rate (%)          | 95.9           | 95.74          |
| Clean Q30 Bases Rate (%)        | 96.24          | 96.22          |
| rRNA Mapping Reads Number       | 387,186        | 851,682        |
| rRNA Mapping Rate (%)           | 0.4            | 1.04           |
| Total Clean Reads Number        | 93,309,872     | 73,681,808     |
| Total Clean Bases Number        | 11,663,734,000 | 9,210,226,000  |
| Total Q30(%)                    | 96.24          | 96.23          |

Supplementary Table S2. lncRNAs response to induction of high fat diet.

| Gene               | ND          | HFD         | FoldChange  |
|--------------------|-------------|-------------|-------------|
| ENSMUSG00000100113 | 2898.502853 | 14012.75202 | 4.834479291 |
| ENSMUSG00000055370 | 2725.088152 | 8639.1303   | 3.170220491 |
| ENSMUSG00000097474 | 46276.95153 | 8577.126972 | 0.185343388 |
| ENSMUSG00000085499 | 2031.42935  | 6634.356044 | 3.265856154 |
| ENSMUSG00000108546 | 2403.03228  | 6438.012173 | 2.679120138 |
| ENSMUSG00000097762 | 9661.676177 | 3988.880737 | 0.412855975 |
| ENSMUSG00000097654 | 511.9862589 | 1240.06655  | 2.422069984 |
| ENSMUSG00000092274 | 3113.206768 | 1033.388792 | 0.331937089 |
| ENSMUSG00000085840 | 355.0872441 | 826.7110335 | 2.328191303 |
| ENSMUSG00000097673 | 1973.62445  | 640.701051  | 0.324631695 |
| ENSMUSG00000097838 | 206.4460722 | 578.6977234 | 2.803142329 |
| ENSMUSG00000097082 | 115.6098004 | 568.3638355 | 4.916225385 |
| ENSMUSG00000089719 | 1907.561707 | 527.0282839 | 0.276283741 |
| ENSMUSG00000097213 | 1304.739176 | 516.6943959 | 0.396013552 |
| ENSMUSG00000108575 | 181.6725435 | 506.360508  | 2.787215384 |
| ENSMUSG00000101596 | 16.51568577 | 444.3571805 | 26.90516074 |
| ENSMUSG00000107736 | 165.1568577 | 372.0199651 | 2.252525086 |
| ENSMUSG00000097764 | 834.0421315 | 361.6860772 | 0.433654444 |
| ENSMUSG00000097168 | 132.1254862 | 341.0183013 | 2.581018327 |
| ENSMUSG00000106659 | 858.8156602 | 341.0183013 | 0.397079743 |
| ENSMUSG00000096938 | 867.0735031 | 341.0183013 | 0.393298031 |
| ENSMUSG00000097332 | 767.9793884 | 330.6844134 | 0.430590219 |
| ENSMUSG00000100546 | 33.03137155 | 289.3488617 | 8.759819777 |
| ENSMUSG00000096958 | 90.83627175 | 268.6810859 | 2.957861223 |
| ENSMUSG00000029092 | 644.1117451 | 248.01331   | 0.385047023 |
| ENSMUSG00000085298 | 16.51568577 | 186.0099825 | 11.26262543 |
| ENSMUSG00000099937 | 57.8049002  | 186.0099825 | 3.217892979 |
| ENSMUSG00000105076 | 66.06274309 | 186.0099825 | 2.815656357 |
| ENSMUSG00000097431 | 49.54705732 | 165.3422067 | 3.337074201 |
| ENSMUSG00000097039 | 8.257842886 | 93.00499127 | 11.26262543 |
| ENSMUSG00000089652 | 8.257842886 | 82.67110335 | 10.0112226  |
| ENSMUSG00000086212 | 173.4147006 | 41.33555167 | 0.238362443 |
| ENSMUSG00000097160 | 107.3519575 | 20.66777584 | 0.192523512 |
| ENSMUSG00000021874 | 107.3519575 | 20.66777584 | 0.192523512 |
| ENSMUSG00000090263 | 132.1254862 | 20.66777584 | 0.156425353 |
| ENSMUSG00000097698 | 148.641172  | 20.66777584 | 0.139044758 |
| ENSMUSG00000038917 | 181.6725435 | 20.66777584 | 0.113763893 |
| ENSMUSG00000105440 | 82.57842886 | 10.33388792 | 0.125140283 |
| ENSMUSG00000101588 | 132.1254862 | 10.33388792 | 0.078212677 |
| ENSMUSG00000086707 | 66.06274309 | 5.166943959 | 0.078212677 |
| ENSMUSG00000097085 | 66.06274309 | 5.166943959 | 0.078212677 |
| ENSMUSG00000108603 | 74.32058598 | 5.166943959 | 0.069522379 |

|         |             |             |             |
|---------|-------------|-------------|-------------|
| lnc_716 | 17306.32746 | 3244.954491 | 0.187501045 |
| lnc_443 | 709.7232079 | 7202.216066 | 10.14792244 |
| lnc_438 | 1091.881858 | 7439.651761 | 6.813605065 |
| lnc_717 | 15886.88104 | 6015.037594 | 0.378616645 |
| lnc_565 | 4312.933341 | 39.57261575 | 0.009175337 |
| lnc_65  | 163.7822788 | 3957.261575 | 24.16172009 |
| lnc_219 | 27.29704646 | 3878.116343 | 142.0709141 |
| lnc_337 | 13047.98821 | 4907.004353 | 0.376073635 |
| lnc_79  | 3494.021947 | 39.57261575 | 0.011325806 |
| lnc_332 | 2675.110553 | 79.1452315  | 0.02958578  |
| lnc_403 | 2620.51646  | 39.57261575 | 0.015101075 |
| lnc_589 | 764.3173009 | 4352.987732 | 5.695262593 |
| lnc_532 | 218.3763717 | 2770.083102 | 12.68490305 |
| lnc_412 | 27.29704646 | 2136.92125  | 78.28397309 |
| lnc_530 | 327.5645575 | 2532.647408 | 7.731750429 |
| lnc_176 | 218.3763717 | 2216.066482 | 10.14792244 |
| lnc_217 | 1419.446416 | 39.57261575 | 0.027878908 |
| lnc_650 | 27.29704646 | 1345.468935 | 49.28990898 |
| lnc_459 | 1201.070044 | 39.57261575 | 0.0329478   |
| lnc_264 | 1201.070044 | 39.57261575 | 0.0329478   |
| lnc_222 | 982.6936725 | 39.57261575 | 0.040269533 |
| lnc_83  | 1419.446416 | 237.4356945 | 0.167273447 |
| lnc_344 | 4367.527434 | 1978.630787 | 0.453032252 |
| lnc_765 | 27.29704646 | 870.5975465 | 31.89347052 |
| lnc_115 | 3275.645575 | 1266.323704 | 0.386587521 |
| lnc_751 | 2019.981438 | 4194.697269 | 2.076601889 |
| lnc_559 | 27.29704646 | 712.3070835 | 26.0946577  |
| lnc_697 | 54.59409292 | 712.3070835 | 13.04732885 |
| lnc_709 | 1528.634602 | 3244.954491 | 2.122779694 |
| lnc_560 | 709.7232079 | 79.1452315  | 0.111515631 |
| lnc_26  | 600.5350221 | 39.57261575 | 0.0658956   |
| lnc_236 | 545.9409292 | 39.57261575 | 0.07248516  |
| lnc_298 | 27.29704646 | 474.871389  | 17.39643846 |
| lnc_723 | 27.29704646 | 474.871389  | 17.39643846 |
| lnc_169 | 163.7822788 | 791.452315  | 4.832344018 |

---

Supplementary Table S3. Detailed gene mapping for KEGG pathway analysis.

| <b>Gene Name</b> | <b>Location</b> | <b>Gene Name</b> | <b>Location</b> |
|------------------|-----------------|------------------|-----------------|
| U2AF2            | nucleus         | SNRPE            | nucleus&cytosol |
| RBMX             | nucleus         | SMNDC1           | nucleus&cytosol |
| HNRNPU           | nucleus         | SRSF3            | nucleus&cytosol |
| SNRPA            | nucleus         | PRPF19           | nucleus&cytosol |
| DHRS4            | nucleus         | HNRNPM           | nucleus&cytosol |
| UQCRC2           | nucleus         | SRSF5            | nucleus&cytosol |
| SLC25A5          | nucleus         | HNRNPK           | nucleus&cytosol |
| CYCS             | nucleus         | PCBP1            | nucleus&cytosol |
| ATP5F1           | nucleus         | SNRPD2           | nucleus&cytosol |
| NDUFA13          | nucleus         | DDX5             | nucleus&cytosol |
| VDAC1            | nucleus         | HNRNPA1          | nucleus&cytosol |
| DLST             | nucleus         | MARS             | nucleus&cytosol |
| ACADM            | nucleus         | LARS             | nucleus&cytosol |
| BDH1             | nucleus         | RARS             | nucleus&cytosol |
| ALDH6A1          | nucleus         | KARS             | nucleus&cytosol |
| CMAS             | nucleus         | EIF2B5           | nucleus&cytosol |
| RPL31            | cytosol         | EIF3E            | nucleus&cytosol |
| RPL8             | cytosol         | EIF2S1           | nucleus&cytosol |
| EIF2S3X          | cytosol         | EIF3A            | nucleus&cytosol |
| EIF2S3Y          | cytosol         | STRAP            | nucleus&cytosol |
| EIF3C            | cytosol         | FXR1             | nucleus&cytosol |
| EIF3D            | cytosol         | EIF4G1           | nucleus&cytosol |
| EIF4G3           | cytosol         | RPL10A           | nucleus&cytosol |
| EIF3B            | cytosol         | RPS20            | nucleus&cytosol |
| EIF4E            | cytosol         | RPL12            | nucleus&cytosol |
| EIF3G            | cytosol         | RPS24            | nucleus&cytosol |
| EIF4A2           | cytosol         | RPSA             | nucleus&cytosol |
| EIF2S2           | cytosol         | RPL26            | nucleus&cytosol |
| EIF3I            | cytosol         | RPL27            | nucleus&cytosol |
| PABPC1           | cytosol         | RPS9             | nucleus&cytosol |
| EIF2B3           | cytosol         | RPS6             | nucleus&cytosol |
| EIF2B4           | cytosol         | RPS4X            | nucleus&cytosol |
| YARS             | cytosol         | RPS5             | nucleus&cytosol |
| NARS             | cytosol         | RPS8             | nucleus&cytosol |
| DARS             | cytosol         | RPS19            | nucleus&cytosol |
| SARS             | cytosol         | RPS17            | nucleus&cytosol |
| EPRS             | cytosol         | RPL22            | nucleus&cytosol |
| VARS             | cytosol         | RPS14            | nucleus&cytosol |
| IARS             | cytosol         | RPS12            | nucleus&cytosol |
| TRAS             | cytosol         | RPS13            | nucleus&cytosol |
| FARSB            | cytosol         | RPS10            | nucleus&cytosol |
| FARSA            | cytosol         | RPS11            | nucleus&cytosol |

|          |                 |         |                       |
|----------|-----------------|---------|-----------------------|
| ACOX1    | cytosol         | RPLP0   | nucleus&cytosol       |
| EHHADH   | cytosol         | RPL9    | nucleus&cytosol       |
| EPHX2    | cytosol         | RPL17   | nucleus&cytosol       |
| IDH2     | cytosol         | RPL19   | nucleus&cytosol       |
| ABCD3    | cytosol         | RPL15   | nucleus&cytosol       |
| HSD17B4  | cytosol         | RPL35   | nucleus&cytosol       |
| HSD17B10 | cytosol         | RPS15A  | nucleus&cytosol       |
| DBT      | cytosol         | RPS3    | nucleus&cytosol       |
| SDS      | cytosol         | RPS25   | nucleus&cytosol       |
| ACOX1    | cytosol         | RPS26   | nucleus&cytosol       |
| HSD17B10 | cytosol         | RPS28   | nucleus&cytosol       |
| SORD     | cytosol         | RPL7    | nucleus&cytosol       |
| DHCR7    | cytosol         | CYC1    | nucleus&cytosol       |
| IDH2     | cytosol         | ATP5C1  | mitochondrion         |
| HSD17B4  | cytosol         | NDUFA4  | mitochondrion         |
| SARDH    | cytosol         | ATP5D   | mitochondrion         |
| HPD      | cytosol         | COX7A2  | mitochondrion         |
| EPHX2    | cytosol         | NDUFB7  | mitochondrion         |
| DBT      | cytosol         | BCKDHA  | mitochondrion         |
| AKR1D1   | cytosol         | GCDH    | mitochondrion         |
| CDC42    | cytosol         | BCKDHA  | mitochondrion         |
| DHRS4    | nucleus&cytosol | GCDH    | mitochondrion         |
| SHMT2    | nucleus&cytosol | HOGA1   | mitochondrion         |
| HADH     | nucleus&cytosol | TST     | mitochondrion         |
| UGDH     | nucleus&cytosol | ATP5D   | membrane              |
| HADH     | nucleus&cytosol | GT1A7C  | membrane              |
| ACLY     | nucleus&cytosol | DAD1    | membrane              |
| SHMT2    | nucleus&cytosol | DDOST   | membrane              |
| TFAM     | nucleus&cytosol | ATP5C1  | membrane              |
| CoX4I1   | nucleus&cytosol | SLC27A2 | peroxisome            |
| SCP2     | nucleus&cytosol | AP2A2   | plasma membrane       |
| PRDX5    | nucleus&cytosol | AP2M1   | lysosomal membrane    |
| HACL1    | nucleus&cytosol | P4HA3   | endoplasmic reticulum |
| SNRPF    | nucleus&cytosol |         |                       |

---

Supplementary Table S4. Sequences of primers and siRNAs used in this study.

| Gene           | Primer sequence (5'→3')     | Size (bp) | Application |
|----------------|-----------------------------|-----------|-------------|
| <i>lncRHL</i>  | F:CTTCGCTTTCTTCAGTCTTG      | 20        | qPCR        |
|                | R:AAACAGTTCATGCTGCTCT       | 20        |             |
| <i>TfIIb</i>   | F:CTCTGTGGCGGCAGCAGCTATTT   | 23        | qPCR        |
|                | R:CGAGGGTAGATCAGTCTGTAGGA   | 23        |             |
| <i>45s</i>     | F:GTGCCCTCACGTGTTTCACTTT    | 22        | qPCR        |
|                | R:TAGGAGACAAACCTGGAACGCT    | 22        |             |
| <i>Lxr</i>     | F:TCTGGAGACGTCACGGAGGTA     | 21        | qPCR        |
|                | R:CCCGGTTGTAAGTGAAGTCCTT    | 22        |             |
| <i>Srebp1c</i> | F:GGAGCCATGGATTGCACATT      | 20        | qPCR        |
|                | R:GGCCCGGAAGTCACTGT         | 18        |             |
| <i>Srebp2</i>  | F:GCAGCAACGGGACCATTCT       | 19        | qPCR        |
|                | R:CCCCATGACTAAGTCCTTCAACT   | 23        |             |
| <i>Acc1</i>    | F:TGGACAGACTGATCGCAGAGAAAAG | 24        | qPCR        |
|                | R:TGGAGAGCCCCACACACA        | 18        |             |
| <i>Fas</i>     | F:GCTGCGGAAACTTCAGGAAAT     | 21        | qPCR        |
|                | R:AGAGACGTGTCCTCCTGGACTT    | 23        |             |
| <i>Gpat</i>    | F:CAACACCATCCCCGACATC       | 19        | qPCR        |
|                | R:GTGACCTTCGATTATGCGATCA    | 22        |             |
| <i>Agpat1</i>  | F:GCTGGCTGGCAGGAATCAT       | 19        | qPCR        |
|                | R:GTCTGAGCCACCTCGGACAT      | 20        |             |
| <i>Dgat1</i>   | F:GAGGCCTCTCTGCCCTATG       | 20        | qPCR        |
|                | R:GCCCCTGGACAACACAGACT      | 20        |             |
| <i>Atgl</i>    | F:GAGAGAACGTCATCATATCCCCTT  | 25        | qPCR        |
|                | R:CCACAGTACACCGGGATAAATGT   | 23        |             |
| <i>Pparaα</i>  | F:ACAAGGCCTCAGGGTACCA       | 19        | qPCR        |
|                | R:GCCGAAAGAAGCCCTTACAG      | 20        |             |
| <i>Cpt1</i>    | F:TTGCCCTACAGCTGGCTCATTTCC  | 24        | qPCR        |
|                | R:GCACCCAGATGATTGGGATACTGT  | 24        |             |
| <i>Mttp</i>    | F:CCTACCAGGCCCAACAAGAC      | 20        | qPCR        |
|                | R:CGCTCAATTTTGCATGTATCC     | 21        |             |
| <i>ApoB</i>    | F:CGTGGGCTCCAGCATTCTA       | 19        | qPCR        |
|                | R:TCACCAGTCATTTCTGCCTTTG    | 22        |             |
| <i>36B4</i>    | F:TGCATCAGTACCCATTCTATCA    | 23        | qPCR        |
|                | R:AAGGTGTAATCCGTCTCCACAGA   | 23        |             |
| <i>hnRNPU</i>  | F:ATGAGTTCTTCGCCTGTTAATGT   | 23        | qPCR        |
|                | R:CCTGGAGTCGATCCATGAGA      | 20        |             |
| <i>Bmal1</i>   | F:TCAAGACGACATAGGACACCT     | 21        | qPCR        |
|                | R:GGACATTGGCTAAAACAACAGTG   | 23        |             |
| <i>Shp</i>     | F:TGGGTCCCAAGGAGTATGC       | 19        | qPCR        |
|                | R:GCTCCAAGACTTCACACAGTG     | 21        |             |
| <i>Gata4</i>   | F:CACGCTGTGGCGTCGTAAT       | 19        | qPCR        |
|                | R:CTGGTTTGAATCCCCTCCTTC     | 21        |             |



|                      |                                                            |          |                |
|----------------------|------------------------------------------------------------|----------|----------------|
| <i>Abcg5</i>         | F:TGGATCCAACACCTCTATGCTAAA<br>R:GGCAGGTTTTCTCGATGAACTG     | 24<br>22 | qPCR           |
| <i>Gm26608</i>       | F:TCCCTCCAAGAAGCGGACTT<br>R:AACTGCTGGGCTGTCTTAGC           | 20<br>20 | qPCR           |
| <i>Neat1</i>         | F:AGGAGAAGCGGGGCTAAGTA<br>R:TAGGACACTGCCCCATGTA            | 20<br>20 | qPCR           |
| <i>4732463B04Rik</i> | F:GTTGTCTTAGCTCCGTCTC<br>R:ACTTAGCCCATAACCGACT             | 19<br>18 | qPCR           |
| <i>2610020F03Rik</i> | F:CTGACGGCAAGGGAGTATGG<br>R:AGCGGACGTGAAGATGACTC           | 20<br>20 | qPCR           |
| <i>Gm26635</i>       | F:GTGATTCTTCTCTCCCAGGC<br>R:ATGCACCCTCAGGAAGTCTG           | 21<br>20 | qPCR           |
| <i>Gm26714</i>       | F:GGACGGGCTTACTCGAAGAG<br>R:CCCGAGCTTTGTTACCCTT            | 20<br>20 | qPCR           |
| <i>Gm9968</i>        | F:GTGCAGATGTGCCACTGAAA<br>R:TGCCTCCATGCACAGTTACATA         | 20<br>22 | qPCR           |
| siRNA1-lncRHL        | F:ACAGAGUACCAAACAUGAA<br>R:UUCAUGUUUGGUACUCUGU             | 19<br>19 | Smart Silencer |
| siRNA2-lncRHL        | F:CCGAACAUA AACUCAUUA<br>R:UUA AUGAGUUUAUGUUCGG            | 19<br>19 | Smart Silencer |
| siRNA3-lncRHL        | F:CCACAAGUCCUCAGAGUUU<br>R:AAACUCUGAGGACUUGUGG             | 19<br>19 | Smart Silencer |
| ASO1-lncRHL          | F:GCCAUCCGUUAAGAUCUGC<br>R:GCAGAAUCUUAACGGAUGGC            | 20<br>20 | Smart Silencer |
| ASO2-lncRHL          | F:CACUGAAC AUGUGUUAGGUC<br>R:GACCUAACACAUGUUCAGUG          | 20<br>20 | Smart Silencer |
| ASO3-lncRHL          | F:UGGUUGCCAAGCUGCAACAU<br>R:AUGUUGCAGCUUGGCAACCA           | 20<br>20 | Smart Silencer |
| 5'-RACE lncRHL1      | F:CGGGTCGCAGAACTTGGACATA<br>R:TATGTCCAAGTTCTGCGACCCG       | 22<br>22 | RACE           |
| 5'-RACE lncRHL2      | F:GTCACTAGAGTTCTGGGAGAC<br>R:GTCTCCCAGAACTCTAGTGAC         | 21<br>21 | RACE           |
| 3'-RACE lncRHL1      | F:CCGCGCTTACCCGCAACTTACTGG<br>R:CCAGTAAGTTGCGGGTAGAGCGCGG  | 25<br>25 | RACE           |
| 3'-RACE lncRHL2      | F:GCAGCGCTCTGCGGATTCCAAGCT<br>R:AGCTTGGAATCCGCAGAGCGCTGC   | 24<br>24 | RACE           |
| siRNA1-hnRNPU        | F:GCTTTGAGATGAAGGTAACAGAGAA<br>R:TTCTCTGTTACCTTCATCACAAGC  | 25<br>25 | siRNA          |
| siRNA2-hnRNPU        | F:ACATGAAGTTCGGATTGGCTGGTCA<br>R:TGACCAGCCAATCCGAACTTCATGT | 25<br>25 | siRNA          |
| Ad-shlncRHL          | F:TGCTTAGTACTGCACTTATT<br>R:AATAAGTGCAGTACTAAGCA           | 20<br>20 | Adenovirus     |
| Ad-shMtp             | F:CCTGAACATCTCCAGTACAT<br>R:ATGTA CTGGAAGATGTT CAGG        | 21<br>21 | Adenovirus     |

Supplementary Table S5. Antibody list for western-blot analysis.

| <b>Name</b>                     | <b>Detail</b>                         | <b>Dilution</b> |
|---------------------------------|---------------------------------------|-----------------|
| Rabbit Polyclonal anti-ABCG5    | Proteintech(27722-1-AP)               | 1:1000          |
| Mouse monoclonal anti-Albumin   | Santa Cruz Biotechnology(sc-271605)   | 1:500           |
| Mouse monoclonal anti-APOA1     | Santa Cruz Biotechnology(sc-376818)   | 1:500           |
| Goat polyclonal anti-APOB       | Milipore(AB742)                       | 1:1000          |
| Mouse monoclonal anti-BMAL1     | Santa Cruz Biotechnology(sc-365645)   | 1:500           |
| Rabbit polyclonal anti-CALNEXIN | ENZO life sciences(ADI-SPA-860)       | 1:3000          |
| Mouse monoclonal anti-GATA4     | Santa Cruz Biotechnology(sc-25310)    | 1:500           |
| Rabbit monoclonal anti-HA       | Cell Signaling Technology(#3724)      | 1:1000          |
| Mouse monoclonal anti-hnRNPA2B1 | Santa Cruz Biotechnology(sc-374053)   | 1:500           |
| Mouse monoclonal anti-hnRNPL    | Santa Cruz Biotechnology(sc-32317)    | 1:500           |
| Mouse monoclonal anti-hnRNPU    | Santa Cruz Biotechnology(sc-32315)    | 1:500           |
| Rabbit polyclonal anti-LAMIN B  | Bioworld(AP6001)                      | 1:5000          |
| Mouse monoclonal anti-LPL       | Santa Cruz Biotechnology(sc-373759)   | 1:500           |
| Mouse monoclonal anti-MTTP      | BD Transduction Laboratories (612022) | 1:5000          |
| Mouse monoclonal anti-PCSK9     | Santa Cruz Biotechnology(sc-515082)   | 1:500           |
| Rabbit monoclonal anti-PDI      | Cell Signaling Technology(#3501)      | 1:1000          |
| Mouse monoclonal anti-SHP       | Santa Cruz Biotechnology(sc-271511)   | 1:500           |
| Rabbit monoclonal anti-TUBULIN  | Santa Cruz Biotechnology(sc-9104)     | 1:500           |
